# Supplementary material for: A time-, angle- and kinetic-energy-resolved photoelectron spectroscopic study of tetrakis(dimethylamino)ethylene
Source: Royal Society of Chemistry journal article supplement (doi:10.1039/d5cp03850b), 2025-11-14
Supplement: d5cp03850b1.pdf [file d5cp03850b1.pdf]

Electronic Supplementary Information for:

## **A time-, angle- and kinetic-energy-resolved photoelectron spectroscopic study of tetrakis(dimethylamino)ethylene**

Yuhuan Tian,<sup>†ab</sup> Zhichao Chen,<sup>†a</sup> Wenping Wu,<sup>ab</sup> Likai Wang,<sup>ab</sup> Zhigang He,<sup>a</sup>  
Dongyuan Yang,<sup>\*a</sup> Guorong Wu<sup>\*a</sup> and Xueming Yang<sup>ac</sup>

<sup>a</sup> *State Key Laboratory of Chemical Reaction Dynamics and Dalian Coherent Light Source, Dalian Institute of Chemical Physics, Chinese Academy of Sciences, 457 Zhongshan Road, Dalian, Liaoning 116023, China.*

<sup>b</sup> *University of Chinese Academy of Sciences, Beijing 100049, China*

<sup>c</sup> *Department of Chemistry and Center for Advanced Light Source Research, College of Science, Southern University of Science and Technology, Shenzhen 518055, China*

<sup>†</sup> *These authors made equal contributions.*

<sup>\*</sup> *Authors to whom correspondence should be addressed.*

*E-mails: yangdy@dicp.ac.cn; wugr@dicp.ac.cn*

### **1. Analysis of the pump-probe signals: the kinetic model associated with all excited states**

To achieve the corresponding fit to the experimental time-resolved photoelectron spectroscopy (TRPES) data of tetrakis(dimethylamino)ethylene (TDMAE), the excited-state decay process can be simply described using multi-exponential decay function along with an oscillatory component as the following expression for  $t \geq 0$ :

$$I(t, eBE) = \sum_{i=1}^4 DAS_i(eBE) \times \exp\left(-\frac{t}{\tau_i}\right) \times (1 + A_{osc})$$

Here,  $A_{osc}$  is described by  $A_i \times \cos\left(\frac{2\pi t}{T} + \varphi_0\right) \times \exp\left(-\frac{t}{\tau_d}\right)$  for  $i$ th time constants,  $\tau_i$ .

According to the final result of the 2D global least-squares fit,  $\tau_1$ ,  $\tau_2$ ,  $\tau_3$  and  $\tau_4$  are determined to be  $50 \pm 10$  fs,  $240 \pm 30$  fs,  $550 \pm 50$  fs and  $>100$  ps, while  $\tau_d$  is  $3.0 \pm 0.5$  ps.

The decay associated spectra (DAS) associated with  $\tau_{1-4}$  are also obtained, as presented in Fig. 3(a). In order to better understand the information provided by the DAS, the relationship between the DAS and the energy-resolved photoionization cross sections of each electronic state should be discussed in detail. Here, the decay mechanism of the initially prepared valence  $\pi\pi^*$  state is proposed to be the following kinetic model:  $\pi\pi^* \rightarrow \pi 3p \rightarrow Z \rightarrow CT \rightarrow S_0$  and  $\pi\pi^* \rightarrow Z \rightarrow CT \rightarrow S_0$ , while the time constants of  $\tau_1$  ( $50 \pm 10$  fs),  $\tau_3$  ( $550 \pm 50$  fs) and  $\tau_4$  ( $>100$  ps) are assigned to the lifetimes of the  $\pi\pi^*$ ,  $\pi 3p$  and zwitterionic states, respectively. The populations of the  $\pi\pi^*$ ,  $\pi 3p$  and zwitterionic states can be described by the following expressions:

$$P_{\pi\pi^*}(t) = P_{\pi\pi^*}(0) \times \exp\left(-\frac{t}{\tau_1}\right)$$

$$P_{\pi 3p}(t) = P_{\pi\pi^*}(0) \times R \times \frac{\tau_3}{\tau_3 - \tau_1} \times \left\{ \exp\left(-\frac{t}{\tau_3}\right) - \exp\left(-\frac{t}{\tau_1}\right) \right\}$$

Here,  $R$  is the branching ratio of  $\pi\pi^* \rightarrow \pi 3p$ .

$$P_Z(t) = P_{\pi\pi^*}(0) \times \left\{ A \times \exp\left(-\frac{t}{\tau_1}\right) + B \times \exp\left(-\frac{t}{\tau_3}\right) + C \times \exp\left(-\frac{t}{\tau_4}\right) \right\}$$

$$\text{While } A = (1 - R) \times \frac{\tau_4}{\tau_1 - \tau_4} + R \times \frac{\tau_1 \tau_4}{(\tau_1 - \tau_3)(\tau_1 - \tau_4)}$$

$$B = R \times \frac{-\tau_3 \tau_4}{(\tau_1 - \tau_3)(\tau_3 - \tau_4)}$$

$$C = (R - 1) \times \frac{\tau_4}{\tau_1 - \tau_4} + R \times \frac{\tau_4^2}{(\tau_1 - \tau_4)(\tau_3 - \tau_4)}$$

Note that when  $R=1$ , the above expressions are same as those in the previous similar study of TDMAE.<sup>1</sup>

$$\text{Then } DAS_1(eBE) = \sigma_{\pi\pi^*}(eBE) - R \times \frac{\tau_3}{\tau_3 - \tau_1} \times \sigma_{\pi 3p}(eBE) + A \times \sigma_Z(eBE)$$

$$DAS_3(eBE) = R \times \frac{\tau_3}{\tau_3 - \tau_1} \times \sigma_{\pi 3p}(eBE) + B \times \sigma_Z(eBE)$$

$$DAS_4(eBE) = C \times \sigma_Z(eBE)$$

Here  $\sigma$  is the energy-resolved photoionization cross sections of each electronic excited state.

Since  $\tau_1 = 50$  fs,  $\tau_3 = 550$  fs,  $\tau_4 > 100$  ps, so  $\tau_4 \gg \tau_1$  and  $\tau_4 \gg \tau_3$

Then  $A \cong 1.1 \times R - 1$ ,  $B \cong -1.1 \times R$ ,  $C \cong 1$

Therefore,

$$DAS_1(eBE) = \sigma_{\pi\pi^*}(eBE) - 1.1 \times R \times \sigma_{\pi 3p}(eBE) + (1.1 \times R - 1) \times \sigma_Z(eBE)$$

$$DAS_3(eBE) = 1.1 \times R \times \sigma_{\pi 3p}(eBE) - 1.1 \times R \times \sigma_Z(eBE)$$

$$DAS_4(eBE) = \sigma_Z(eBE)$$

$$\sigma_{\pi\pi^*}(eBE) = DAS_1(eBE) + DAS_3(eBE) + DAS_4(eBE)$$

$$\sigma_{\pi 3p}(eBE) = \frac{DAS_3(eBE)}{1.1 \times R} + DAS_4(eBE)$$

$$\sigma_Z(eBE) = DAS_4(eBE)$$

If the photoionization cross-sections of the  $\pi\pi^*$  state and the  $\pi 3p$  state are assumed to be identical, then  $\sum \sigma_{\pi\pi^*}(eBE) = \sum \sigma_{\pi 3p}(eBE)$ ,

$$R = \sum DAS_3(eBE) / \{1.1 \times \sum DAS_1(eBE) + 1.1 \times \sum DAS_3(eBE)\}$$

It should be noted that the  $\pi 3d$  state is also partly excited at 266.9 nm, and its deactivation pathway is suggested to be internal conversion of  $\pi 3d \rightarrow \pi\pi^*$ , followed by the decay dynamics of the  $\pi\pi^*$  state. The time constant of  $\tau_2$  ( $240 \pm 30$  fs) is assigned to the lifetime of the  $\pi 3d$  state. Therefore,

$$P_{\pi 3d}(t) = P_{\pi 3d}(0) \times \exp\left(-\frac{t}{\tau_2}\right)$$

$$P_{\pi\pi^*}(t) = P_{\pi 3d}(0) \times \frac{\tau_1}{\tau_2 - \tau_1} \times \left\{ \exp\left(-\frac{t}{\tau_2}\right) - \exp\left(-\frac{t}{\tau_1}\right) \right\} + P_{\pi\pi^*}(0) \times \exp\left(-\frac{t}{\tau_1}\right)$$

For low eBE region, for example,  $eBE \leq 1.8$  eV,  $\sigma_{\pi 3p}(eBE) \cong 0$ ,  $\sigma_Z(eBE) = 0$ , then,

$$DAS_2(eBE) = \frac{\tau_2}{\tau_2 - \tau_1} \times \sigma_{\pi 3d}(eBE)$$

$$DAS_1(eBE) = \left\{ \frac{-\tau_1}{\tau_2 - \tau_1} + P_{\pi\pi^*}(0)/P_{\pi 3d}(0) \right\} \times \sigma_{\pi\pi^*}(eBE)$$

If we assume that  $\sum \sigma_{\pi\pi^*}(eBE) = \sum \sigma_{\pi 3d}(eBE)$ ,

$$P_{\pi\pi^*}(0)/P_{\pi 3d}(0) = \frac{\tau_2}{\tau_2 - \tau_1} \times \sum DAS_1(eBE) / \sum DAS_2(eBE) + \frac{\tau_1}{\tau_2 - \tau_1}$$

According to the eBE-resolved DAS shown in Fig. 3(a),

$$\sum DAS_1(eBE) / \sum DAS_2(eBE) \leq \sum DAS_1(eBE \leq 1.8 \text{ eV}) / \sum DAS_2(eBE \leq 1.8 \text{ eV}) \cong 4.3$$

$$\text{Then, } P_{\pi\pi^*}(0)/P_{\pi 3d}(0) \leq \frac{\tau_2}{\tau_2 - \tau_1} \times 4.3 + \frac{\tau_1}{\tau_2 - \tau_1} \cong 5.7$$

$$P_{\pi 3d}(0)/\{P_{\pi\pi^*}(0) + P_{\pi 3d}(0)\} \leq \frac{1}{6.7} \cong 15\%$$

Therefore, when  $P_{\pi\pi^*}(0)/P_{\pi 3d}(0) = 5.7$

$$P_{\pi\pi^*}(t) = P_{\pi\pi^*}(0) \times \{0.954 \times \exp\left(-\frac{t}{\tau_1}\right) + 0.046 \times \exp\left(-\frac{t}{\tau_2}\right)\}$$

Compared with  $P_{\pi\pi^*}(t) = P_{\pi\pi^*}(0) \times \exp\left(-\frac{t}{\tau_1}\right)$ , i.e., the excitation of  $\pi 3d$  is not considered, when both  $\pi\pi^*$  and  $\pi 3d$  states are excited here, we still have

$$R \cong \sum DAS_3(eBE) / \{1.1 \times \sum DAS_1(eBE) + 1.1 \times \sum DAS_3(eBE)\}$$

When the  $DAS_1$  and  $DAS_3$  in the higher eBE region ( $eBE > 2.2 \text{ eV}$ ) is not used,

$$R \cong \sum DAS_3(eBE \leq 2.2 \text{ eV}) / \{1.1 \times \sum DAS_1(eBE \leq 2.2 \text{ eV}) + 1.1 \times \sum DAS_3(eBE \leq 2.2 \text{ eV})\} \cong 0.7$$

Both qualitative and quantitative analyses of the decay associated spectra at electron binding energies higher than 2.5 eV are beyond our ability.

## 2. Analysis of the damping of the oscillations

The population of each electronic excited state,  $P_j(t)$ , should be multiplied by  $1 + A'_{\text{osc}}$ , where  $A'_{\text{osc}}$  is described by  $A'_j \times \cos\left(\frac{2\pi t}{T_j} + \varphi_j\right) \times \exp\left(-\frac{t}{\tau_d}\right)$  for  $j$ th electronic excited state ( $\pi\pi^*$ ,  $\pi 3d$ ,  $\pi 3p$ ,  $Z$ ). Then,

$$I(t \geq 0, eBE) = \sum_j \sigma_j(eBE) \times P_j(t) \times \{1 + A'_j \times \cos\left(\frac{2\pi t}{T_j} + \varphi_j\right) \times \exp\left(-\frac{t}{\tau_d}\right)\}$$

$$I(t < 0, eBE) = 0$$

The experimental TRPES signal should be a numerical convolution of the instrumental response function (IRF) and the multi-exponential decay function of excited state populations,  $I(t, eBE)$ . As illustrated in Fig. S1, the photoelectron transients in different electron binding energy regions contain the oscillations with a very regular period ( $T$ ) of  $\sim 500 \text{ fs}$  and an invariant initial phase ( $\varphi_0$ ) of zero. Then,

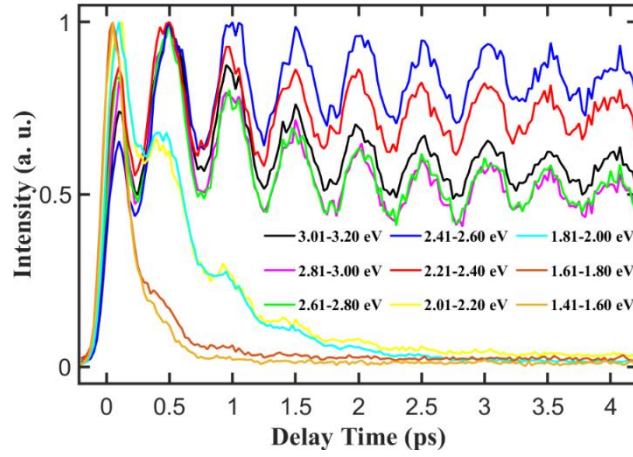

Fig. S1 Normalized photoelectron transients integrated over different electron binding energy ranges.

$$\begin{aligned}
 I(t \geq 0, eBE) &= \sum_j \sigma_j(eBE) \times P_j(t) \times \left\{ 1 + A'_j \times \cos\left(\frac{2\pi t}{T} + \varphi_0\right) \times \exp\left(-\frac{t}{\tau_d}\right) \right\} \\
 &= \sum_j \sigma_j(eBE) \times P_j(t) + \sum_j \sigma_j(eBE) \times P_j(t) \times \left\{ A'_j \times \cos\left(\frac{2\pi t}{T} + \varphi_0\right) \times \exp\left(-\frac{t}{\tau_d}\right) \right\} \\
 &= \sum_j \sigma_j(eBE) \times P_j(t) + \left\{ \cos\left(\frac{2\pi t}{T} + \varphi_0\right) \times \exp\left(-\frac{t}{\tau_d}\right) \right\} \times \sum_j A'_j \times \sigma_j(eBE) \times P_j(t)
 \end{aligned}$$

According to the above specific kinetic model,

$$\begin{aligned}
 I(t \geq 0, eBE) &= \sum_{i=1}^4 DAS_i(eBE) \times \exp\left(-\frac{t}{\tau_i}\right) + \left\{ \cos\left(\frac{2\pi t}{T} + \varphi_0\right) \times \exp\left(-\frac{t}{\tau_d}\right) \right\} \times \\
 &\quad \sum_{i=1}^4 A_i \times DAS'_i(eBE) \times \exp\left(-\frac{t}{\tau_i}\right)
 \end{aligned}$$

Note that here the decay associated spectra ( $DAS'_i$ ) of the oscillatory components are not identical to those ( $DAS_i$ ) of the components without the oscillations.

Since  $\tau_1(50 \text{ fs}) \ll T(500 \text{ fs})$ , the oscillation associated with  $\tau_1$  can be neglected, so  $1 + A_{\text{osc}(i=1)} \cong 1$ , moreover,  $\tau_2(240 \text{ fs}) < T(500 \text{ fs})$  and its amplitude ( $DAS_2$ ) is relatively weak, then we assume that  $1 + A_{\text{osc}(i=2)} \cong 1$  in the fit, therefore,

$$\begin{aligned}
 I(t \geq 0, eBE) &= \sum_{i=1}^4 DAS_i(eBE) \times \exp\left(-\frac{t}{\tau_i}\right) + \left\{ \cos\left(\frac{2\pi t}{T} + \varphi_0\right) \times \exp\left(-\frac{t}{\tau_d}\right) \right\} \times \\
 &\quad \sum_{i=3}^4 A_i \times DAS'_i(eBE) \times \exp\left(-\frac{t}{\tau_i}\right)
 \end{aligned}$$

Only if  $A'_j$  is invariant for the involved  $\pi 3p$  and  $Z$  states, i.e.,  $A'_{j=3} = A'_{j=4} = A'$ ,

$$\begin{aligned}
 I(t \geq 0, eBE) &= \sum_{i=1}^4 DAS_i(eBE) \times \exp\left(-\frac{t}{\tau_i}\right) \\
 &\quad + \left\{ A' \times \cos\left(\frac{2\pi t}{T} + \varphi_0\right) \times \exp\left(-\frac{t}{\tau_d}\right) \right\} \times \sum_{i=3}^4 DAS_i(eBE) \times \exp\left(-\frac{t}{\tau_i}\right)
 \end{aligned}$$

$$\text{i.e., } I(t \geq 0, eBE) = \sum_{i=1}^2 DAS_i(eBE) \times \exp\left(-\frac{t}{\tau_i}\right) + \left\{1 + A' \times \cos\left(\frac{2\pi t}{T} + \varphi_0\right) \times \exp\left(-\frac{t}{\tau_d}\right)\right\} \times \sum_{i=3}^4 DAS_i(eBE) \times \exp\left(-\frac{t}{\tau_i}\right)$$

Finally, a satisfactory 2D global least-squares fit to the TRPES spectrum (Fig. 2 (a)) can be achieved, as shown in Fig. 3 and Fig. 4. In Fig. 4(b) and (c), the dashed line represents the fit without the oscillatory component (i.e.,  $A_i = A' = 0$  in the above equation). The damping time constant ( $\tau_d$ ) of  $3.0 \pm 0.5$  ps must be needed to represent the dephasing of the specific vibrational motion which causes the periodic modulation, while  $\tau_d = \infty$  (i.e.,  $\exp\left(-\frac{t}{\tau_d}\right) \cong 1$ ) corresponds to a complete decoupling of this vibrational motion. The comparison of these different fits is shown in Fig. S2.

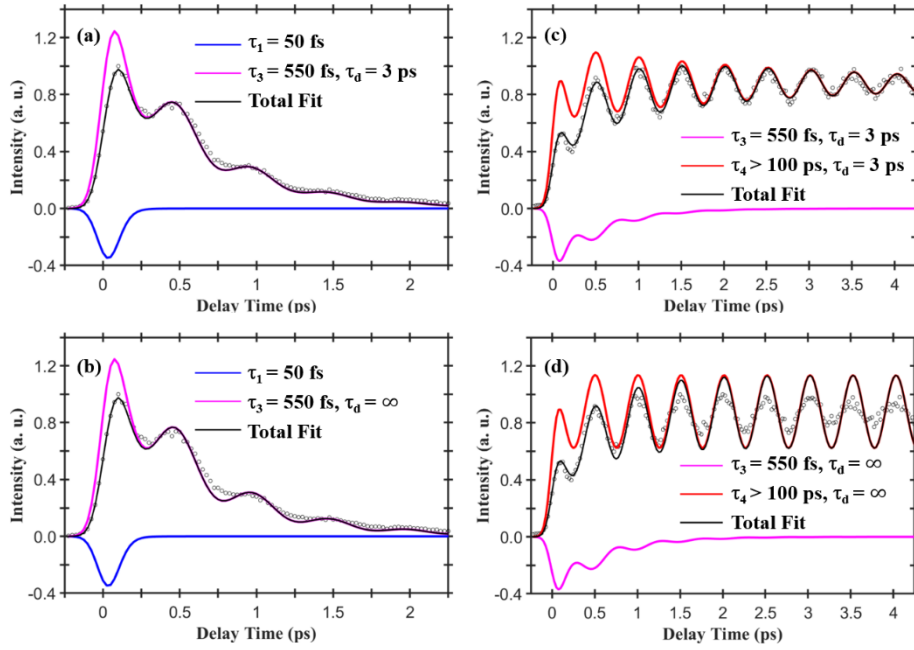

Fig. S2 (a) and (c) Normalized photoelectron transients integrated over electron binding energy ranges of 1.88-2.02 and 2.35-2.45 eV, respectively. The cycles show the experimental data, while the solid lines show the corresponding fits. (b) and (d) Same as (a) and (c), but the value of  $\tau_d$  is  $\infty$ , instead of 3 ps.

### 3. TRPES spectrum at large delays

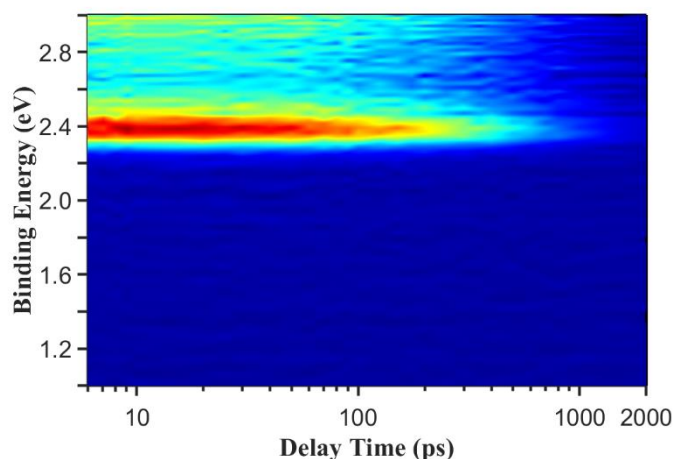

Fig. S3 TRPES spectrum of TDMAE excited at 266.9 nm after subtracting the background photoelectrons generated from single-color multiphoton ionization. Note that a logarithmic scale is used for the delays larger than 6 ps.

### 4. Single-color two-photon photoelectron spectrum at 266.9 nm

The single-color photoelectron spectrum of TDMAE at 266.9 nm are shown in Fig. S4. The pulse duration of 266.9 nm femtosecond laser pulses was estimated to be 110-120 fs (FWHM), which strongly affect the relative detection efficiency of electronic excited states with different lifetimes. Therefore, the peak positions of the electron binding energy should be invariant compared with those in Fig. 2(a) and (b), while the relative intensity of these peaks is different in single-color and time-resolved two-color 1+1' photoelectron spectra.

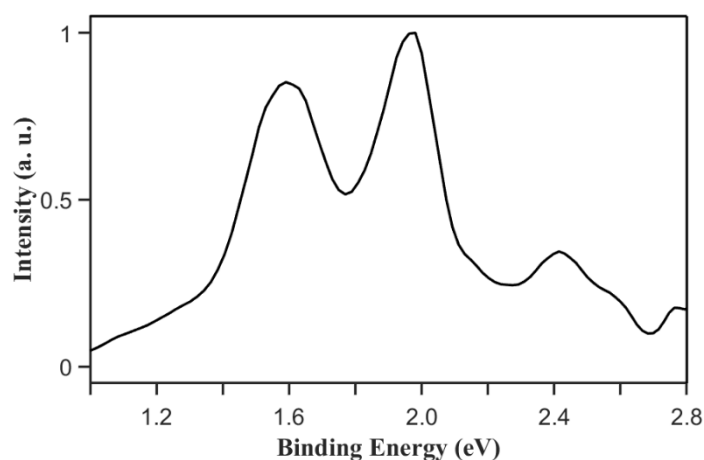

Fig. S4 Normalized electron binding energy distribution of TDMAE generated from single-color two-photon ionization at 266.9 nm.

## 5. The measurement of the time-zero and cross-correlation

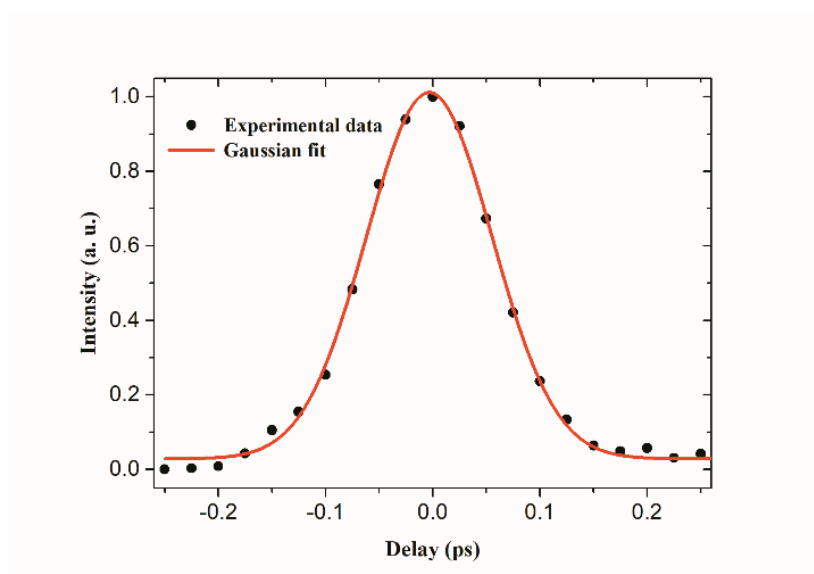

Fig. S5 Normalized photoelectron transient generated from two-color 1+3' multiphoton ionization process of Xe.

1. E. Gloaguen, J. M. Mestdagh, L. Poisson, F. Lepetit, J. P. Visticot, B. Soep, M. Coroiu, A. Eppink and D. H. Parker, *J. Am. Chem. Soc.*, 2005, **127**, 16529-16534.
